# Supplementary material for: Targeted delivery of siRNA using RGDfC-conjugated functionalized selenium nanoparticles for anticancer therapy
Source: Royal Society of Chemistry journal article supplement (doi:10.1039/c7tb01315a), 2017-01-01
Supplement: c7tb01315a1.pdf [file c7tb01315a1.pdf]

## Supporting Information

### Targeted Delivery of siRNA Using RGDfC-Conjugated Functionalized Selenium Nanoparticles for Anticancer Therapy

Yu Xia,<sup>a</sup> Zhengfang Lin,<sup>a</sup> Yinghua Li,<sup>a</sup> Mingqi Zhao,<sup>a</sup> Changbing Wang,<sup>a</sup> Min Guo,<sup>a</sup> Bo Zhang<sup>\*,b</sup>  
and Bing Zhu<sup>\*,a</sup>

<sup>a</sup> Central Laboratory, Guangzhou Women and Children's Medical Center, Guangzhou Medical University, Guangzhou 510120, China

<sup>b</sup> Key Laboratory of Special Pathogens and Biosafety, Center for Emerging Infectious Diseases, Wuhan Institute of Virology, Chinese Academy of Sciences, Wuhan 430071, China

\* Address for Correspondence: Bing Zhu

Guangzhou Women and children's Medical center, No 318 Renminzhong road, Yuexiu District, Guangzhou, Guangdong, 510120, People's Republic of China

Tel +86 20 8133 0740

Fax +86 20 8188 5978

Email: zhubing2017@hotmail.com

\* Address for Correspondence: Bo Zhang

Key Laboratory of Special Pathogens and Biosafety, Center for Emerging Infectious Diseases, Wuhan Institute of Virology, Chinese Academy of Sciences, No 44 Hongshan District, Wuhan, 430071, People's Republic of china

Tel +86 27 8719 7822

Fax +86 27 8719 7822

Email: zhangbowh2017@hotmail.com

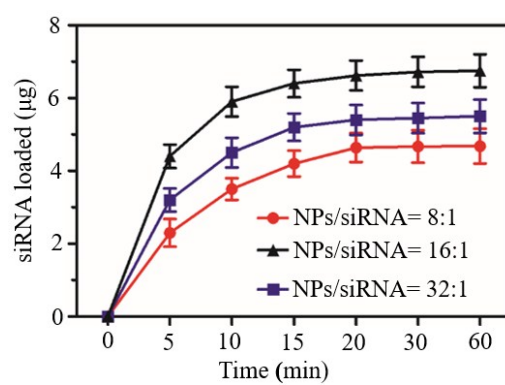

**Fig. S1** Loading quantity of siRNA onto RGDFC-SeNPs (NPs) with different RGDFC-SeNPs/siRNA ratio.

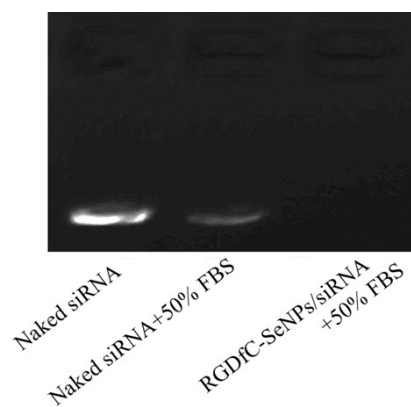

**Fig. S2** Agarose gel electrophoretogram showing siRNA protection by RGDfC-SeNPs for 1 h incubation compared to siRNA exposed to 50% serum. Naked siRNA not exposed to serum was used as control.

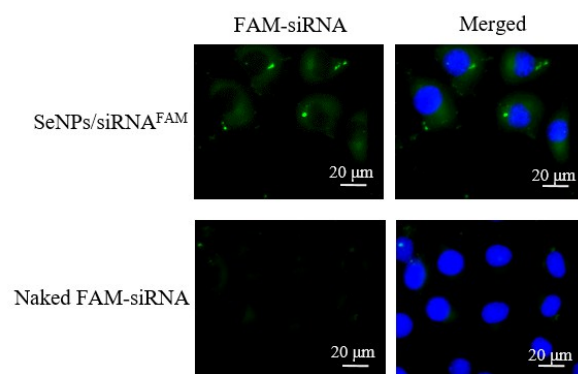

**Fig. S3** Confocal images of HepG2 cells incubated with SeNPs/siRNA<sup>FAM</sup> and Naked FAM-siRNA for 2 h, respectively. siRNA was visualized via green fluorescence, and cell nuclei was stained with DAPI (blue).

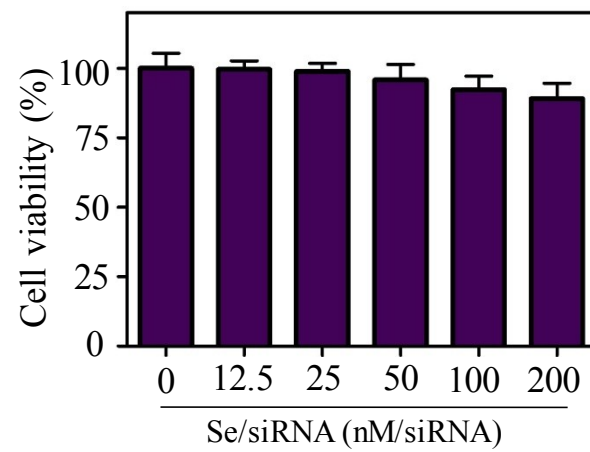

**Fig. S4** In vitro cytotoxicity of RGDfC-SeNPs/siRNA (Se/siRNA) on L0-2 cells after incubation for 48 h.

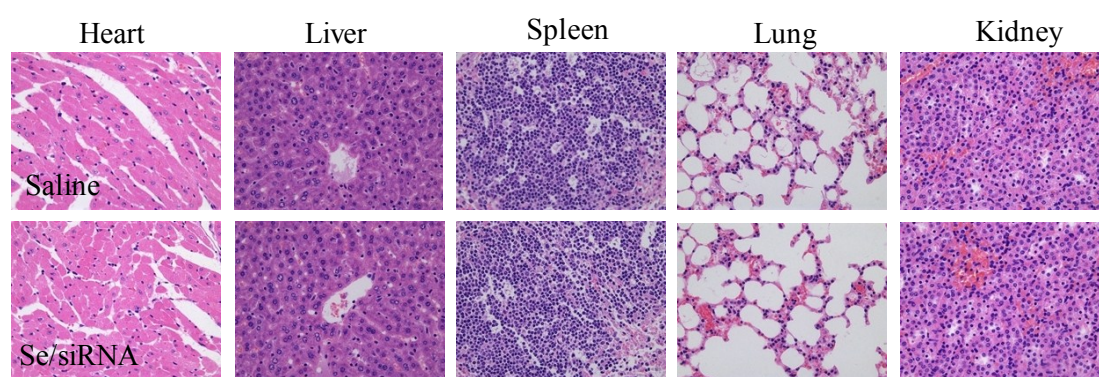

**Fig. S5** H&E analyses of heart, liver, spleen, lung and kidney after treatment with saline or RGDfC-SeNPs/siRNA (Se/siRNA).
